# Supplementary figures and images for: A comparative epidemiologic analysis of SARS in Hong Kong, Beijing and Taiwan
Source: Springer Nature journal article supplement (doi:10.1186/1471-2334-10-50), 2010-03-06

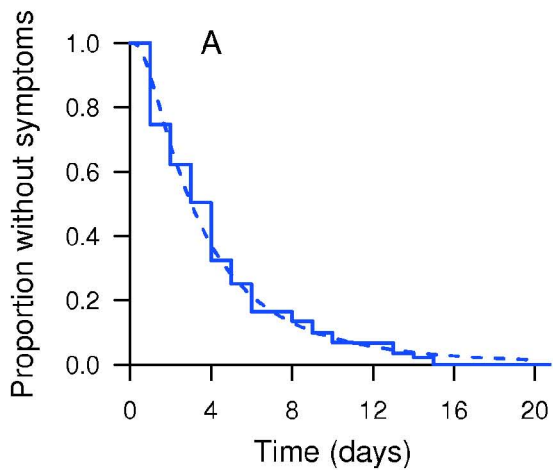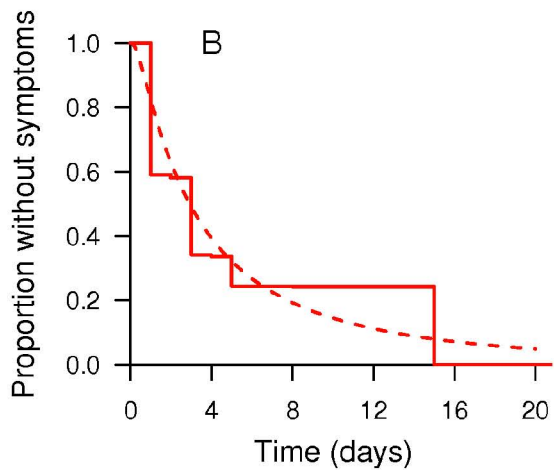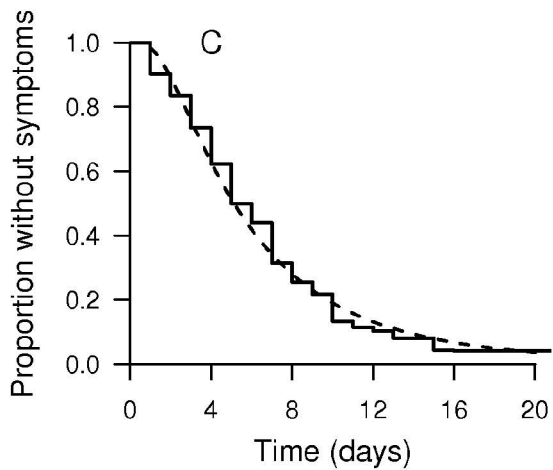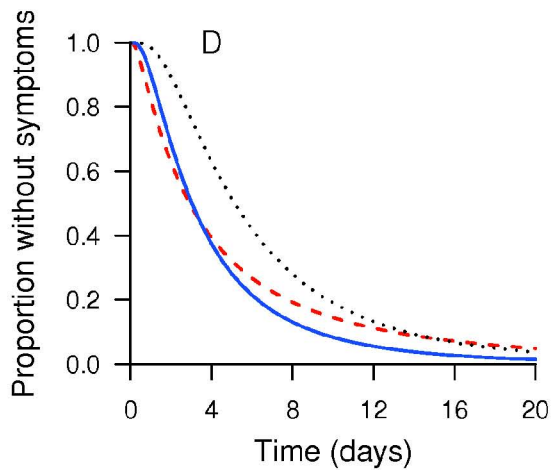

Supplement: 12879_2009_1030_MOESM7_ESM.pdf [file 12879_2009_1030_MOESM7_ESM.pdf]

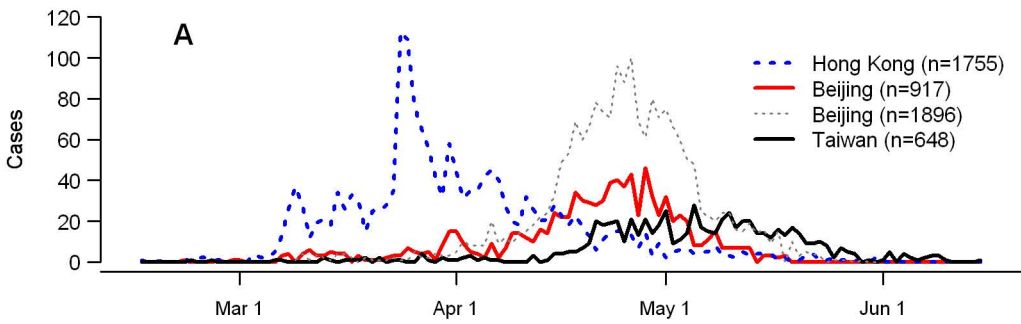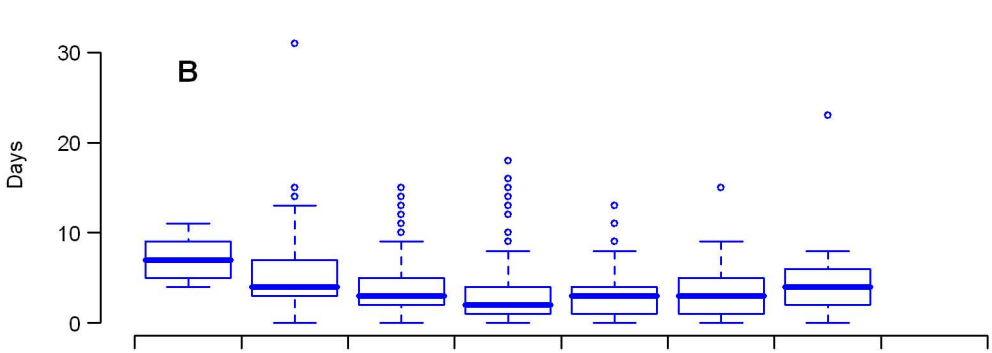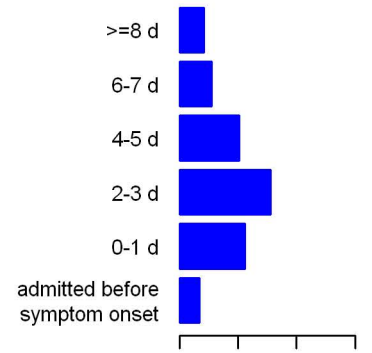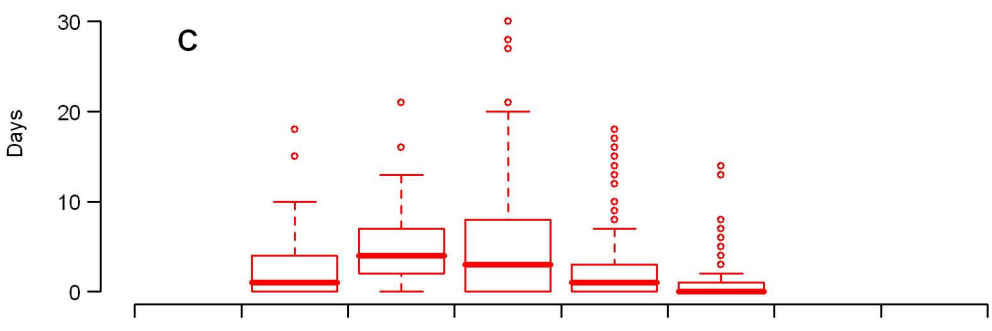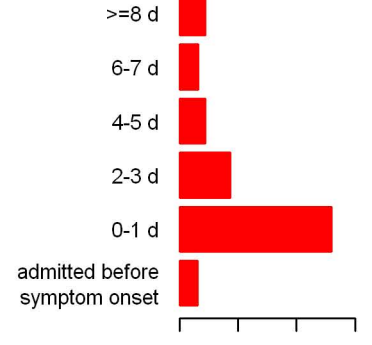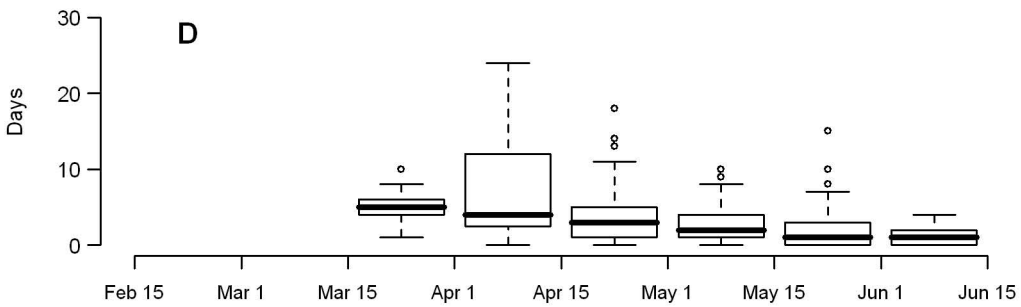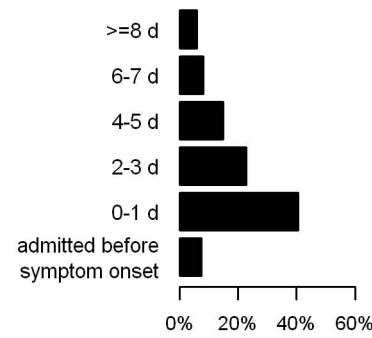

Period

Supplement: 12879_2009_1030_MOESM8_ESM.pdf [file 12879_2009_1030_MOESM8_ESM.pdf]

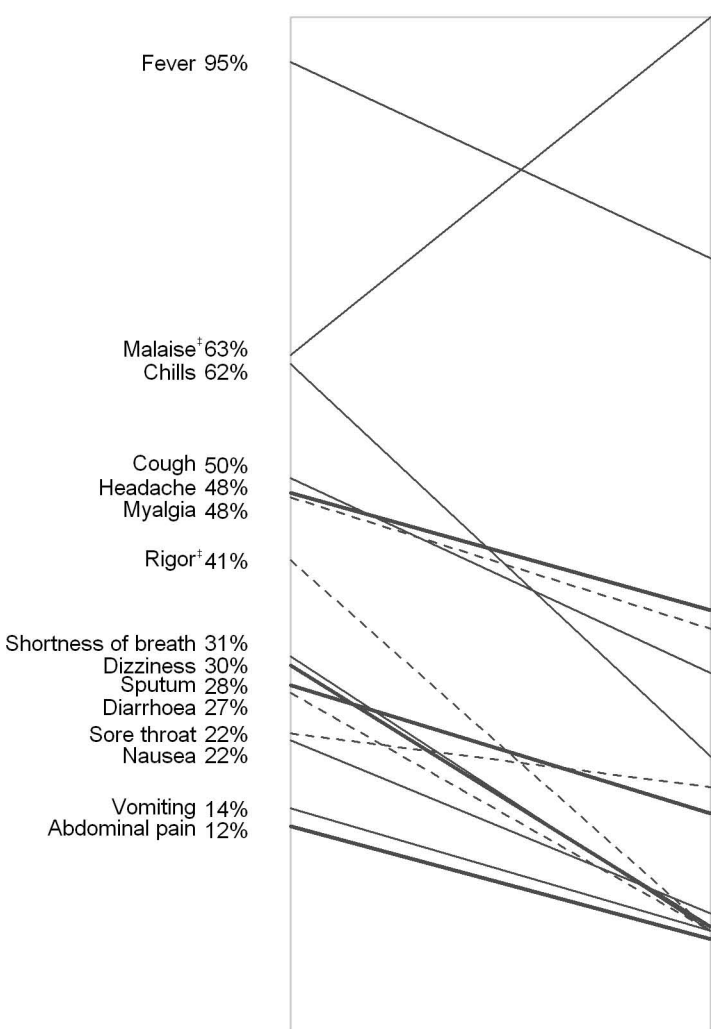

Hong Kong

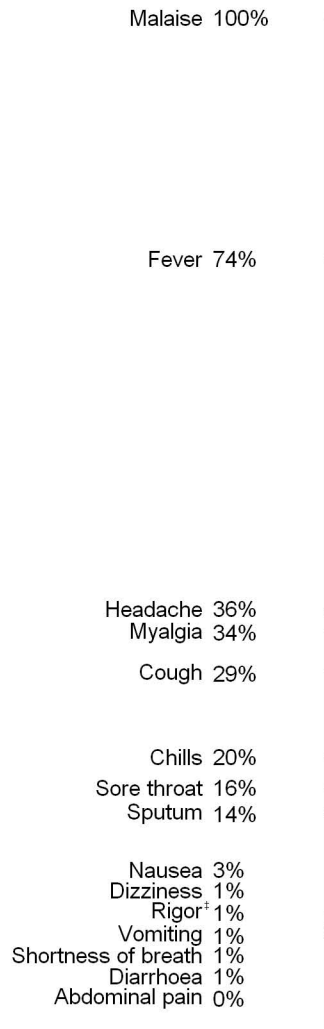

Beijing

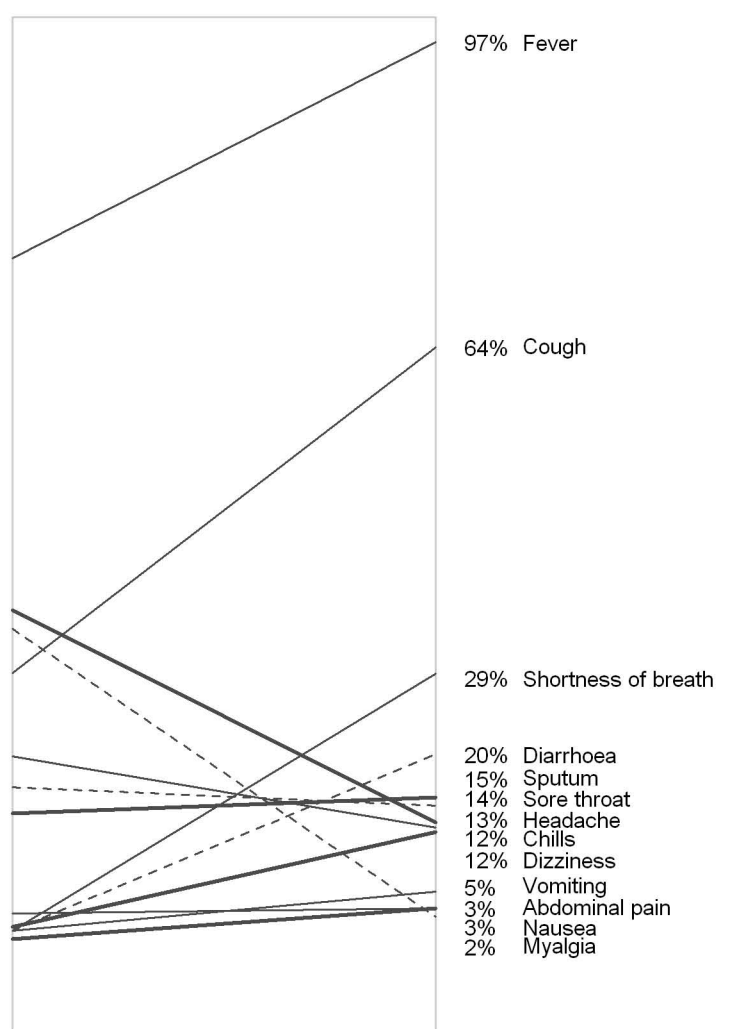

Taiwan

Supplement: 12879_2009_1030_MOESM9_ESM.pdf [file 12879_2009_1030_MOESM9_ESM.pdf]
